# Supplementary material
Source: PubMed Central journal article supplement (PMC7983501)
Supplement: sj-pdf-2-jcb-10.1177_0271678X20931137.pdf [file sj-pdf-2-jcb-10.1177_0271678X20931137.pdf]

## Supplementary Figure 2

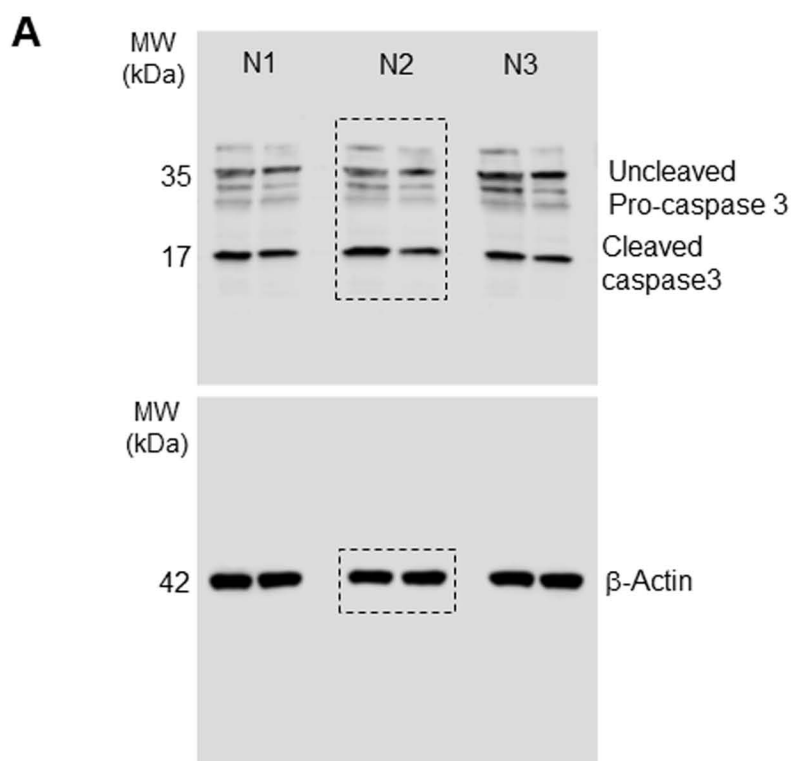

Full unedited blots for Figure 6C. The lanes of the unedited blots that appear in the cropped image in the manuscript are shown by dotted box.

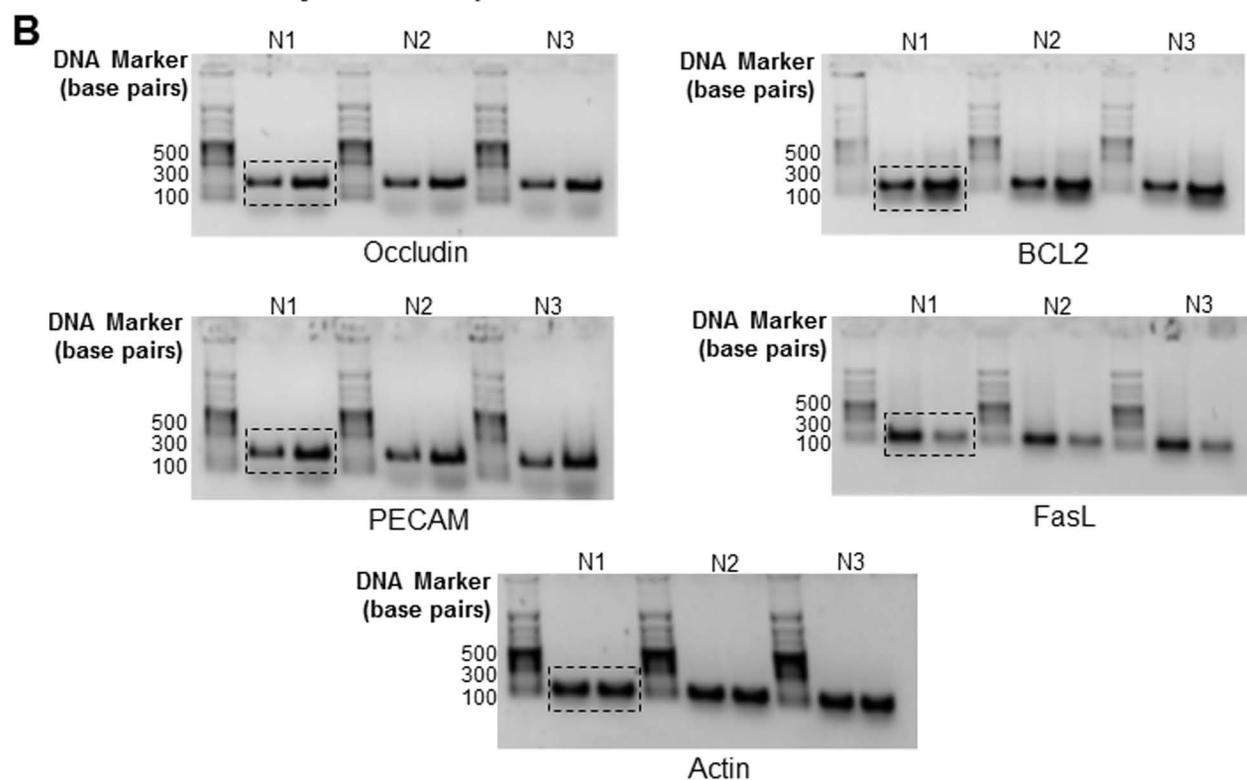

Full unedited gels for Figure 7B. The lanes of the unedited gels that appear in the cropped image in the manuscript are shown by dotted box.
